1 **Title:**

2 **The Role of Interleukin-1 cytokine family (IL-1 $\beta$ , IL-37) and interleukin-12 cytokine**  
3 **family (IL-12, IL-35) in eumycetoma infection pathogenesis.**

4

5

6 **Authors**

7 Amir Abushouk<sup>1,2</sup>, Amre Nasr<sup>1,2,3</sup>, Emad Masuadi<sup>4</sup>, Gamal Allam<sup>5,6</sup>, Emmanuel E. Siddig<sup>7</sup>,  
8 Ahmed H. Fahal<sup>7</sup>

9

10 <sup>1</sup>Department of Basic Medical Sciences, College of Medicine, King Saud Bin Abdul-Aziz  
11 University for Health Sciences, Jeddah, Kingdom of Saudi Arabia. E. mail: [shouka@ksau-  
12 hs.edu.sa](mailto:shouka@ksau-<br/>12 hs.edu.sa)

13

14 <sup>2</sup>King Abdullah International Medical Research Centre, National Guard Health Affairs,  
15 Kingdom of Saudi Arabia.

16

17 <sup>3</sup>Department of Microbiology, College of Sciences and Technology, Al-Neelain University,  
18 P.O. Box 1027, Khartoum, Sudan. [nasra@ksau-hs.edu.sa](mailto:nasra@ksau-hs.edu.sa)

19

20 <sup>4</sup>Research Unit, Department of Medical Education, College of Medicine-Riyadh, King Saud  
21 Bin Abdul-Aziz University for Health Sciences, Riyadh, Kingdom of Saudi Arabia. E. mail:  
22 [masuadie@ksau-hs.edu.sa](mailto:masuadie@ksau-hs.edu.sa)

23

24 <sup>5</sup>Department of Microbiology and Immunology, College of Medicine, Taif University, Taif,  
25 Saudi Arabia. E. mail: [g.allam@tu.edu.sa](mailto:g.allam@tu.edu.sa)

26

27 <sup>6</sup>Immunology Section, Department of Zoology, Faculty of Science, Beni-Suef University,  
28 Beni-Suef, Egypt. E. mail: [g.allam@science.bsu.edu.eg](mailto:g.allam@science.bsu.edu.eg)

29

30 <sup>7</sup>Mycetoma Research Centre, University of Khartoum, Khartoum, Sudan. E. mail: [emanwell-](mailto:emanwell-eds3@hotmail.com)  
31 [eds3@hotmail.com](mailto:eds3@hotmail.com)

32

33

#### 34 **Corresponding Author**

35 Professor Ahmed Hassan Fahal, Professor of Surgery, The Mycetoma Research Centre,  
36 University of Khartoum, Khartoum, Sudan. E. mail: [ahfahal@hotmail.com-](mailto:ahfahal@hotmail.com)  
37 [ahfahal@uofk.edu](mailto:ahfahal@uofk.edu)

38

39

40

41

42

43

44

45

46

47 **Abstract**

48 Mycetoma is a neglected tropical disease, endemic in many tropical and subtropical regions,  
49 characterised by massive deformity and disability and can be fatal if untreated early and  
50 appropriately. Interleukins (IL) -35 and IL-37 are newly discovered cytokines that play an  
51 important role in suppressing the immune system. However, the expression of these  
52 interleukins in patients with *Madurella mycetomatis* (*M. mycetomatis*) induced eumycetoma  
53 has not yet been explored. This study aims to determine the levels of the IL-1 family (IL-1 $\beta$ ,  
54 IL-37) and IL-12 family (IL-12, IL-35) in a group of these patients and the association  
55 between these cytokines levels and the patients' demographic characteristics. The present,  
56 a case-control study was conducted at the Mycetoma Research Centre, Soba University  
57 Hospital, University of Khartoum, Sudan and it included 140 individuals. They were divided  
58 into two groups; group I: healthy controls [n = 70; median age 25 years (range 12 to 70  
59 years)]. Group II: mycetoma patients [n = 70 patients; median age 25 (range 13 to 70  
60 years)]. Cytokines levels were measured in sera using enzyme-linked immunosorbent assay  
61 (ELISA).

62 There was no significant correlation between the IL-1 $\beta$  and IL-12 levels and the lesions size  
63 and disease duration, whereas levels of IL-37 and IL-35 were significantly correlated with  
64 that. The analysis of the risk factors of higher circulatory levels of IL-37 in patients of  
65 mycetoma showed a significant negative association with IL-1 $\beta$  cytokine, where a unit  
66 increment in IL-1 $\beta$  will decrease the levels of IL-37 by 35.28 pg/ml. The levels of IL-37  
67 among the patients with a duration of mycetoma infection  $\leq$  one year had significantly  
68 decreased by an average of 18.45 compared to patients with a mycetoma infection's  
69 duration of  $\geq$  5years (reference group). Furthermore, the risk factors of higher levels of IL-35

70 in mycetoma patients revealed a significant negative association with IL-12, as a unit  
71 increment in IL-12 decreases the levels of IL-35 by 8.99 pg/ml ( $p < 0.001$ ). Levels of IL-35  
72 among the patients with duration of mycetoma infection  $\leq$  one year had significantly  
73 decreased ( $p$ -value = 0.002) on average by 41.82 compared to patients with a duration of  
74 mycetoma infection  $\geq$  five years (reference group). In conclusion, this study indicates that  
75 both IL-35 and IL-37 are negatively associated with the levels of IL-1 $\beta$  and IL-12 in  
76 eumycetoma mycetoma infection; and high levels of IL-37 and IL-35 may have a negative  
77 impact on disease progression.

78

### 79 **Authors Summary**

80 Mycetoma is a progressive chronic granulomatous fungal or bacterial infection that may  
81 result in massive destruction of subcutaneous tissues, muscles and bones. Mycetoma is  
82 a neglected disease which is endemic in many tropical and subtropical areas. If the  
83 disease is not treated properly, eventually it ends up with amputation and adverse  
84 medical, health and socioeconomic effects on patients and the community.

85 Previous data suggested a crucial role of adaptive immunity in host resistance to  
86 causative agents and the disease progression. The recently identified IL -35 and IL-37  
87 cytokines revealed an important role in immune suppression. Nevertheless, the  
88 expression of these interleukins in patients with mycetoma has not yet been  
89 investigated. Therefore, the present case-control study aimed to determine the levels of  
90 IL-1 family (IL-1 $\beta$ , IL-37) and IL-12 family (IL-12, IL-35) in these patients and the  
91 association between these cytokines levels and the patients' demographic  
92 characteristics.

93 The results of this study showed that the levels of IL-37 and IL-35 were consistently  
94 positively correlated with different diameters of mycetoma lesions as well as its duration.  
95 However, the levels of IL-1 $\beta$  and IL-12 were consistently negatively correlated with  
96 different diameters of lesions and the duration of mycetoma infection. The analysis of  
97 the risk factors of higher circulatory levels of IL-37 in patients of mycetoma showed a  
98 significant negative association with IL-1 $\beta$  cytokine. Furthermore, the risk factors of  
99 higher levels of IL-35 in patients of mycetoma revealed a significant negative  
100 association with IL-12. These findings uncover a possible the role of IL-35 and IL-37 in  
101 the pathogenesis of mycetoma and may declare their potential value in the treatment of  
102 mycetoma.

103

104

105

## 106 **Introduction**

107 Mycetoma is a chronic granulomatous subcutaneous inflammatory disease, caused by  
108 certain bacteria (actinomycetoma) or fungi (eumycetoma). This infection progresses to affect  
109 the deep structures and bones leading to massive destruction, deformities and disabilities  
110 [1]. It constitutes a major health problem in many tropical and subtropical countries, and it is  
111 highly endemic in Sudan, Mexico, and India. In Sudan, more than 8500 patients were  
112 managed at the Mycetoma Research Centre in Khartoum, of whom 70% were infected with  
113 the fungus *M. mycetomatis*. The disease affects all age groups, but it occurs most  
114 commonly in young men at the age group 20 to 40 years [2]. The disease is usually  
115 painless, and the clinical diagnosis is commonly based on the presence of subcutaneous

116 mass, multiple sinuses and seropurulent discharge with grains. Treatment opportunities  
117 comprise of various chemotherapeutics agents and wide surgical excision of the infected  
118 tissues and may possibly end up with limb amputation [3].

119 Although most individuals in endemic areas have antibodies against the causative agent of  
120 mycetoma; only a few develop the disease [4]. This disparity in host response is due to the  
121 interplay between the host and the pathogen [4]. Both innate and adaptive immunity play a  
122 role in host resistance to causative agents and the development of the disease. Therefore,  
123 T-cell responses seem to be important in the progress of mycetoma [5, 6]. A Th2-like  
124 response was reported in primary lesions and in draining lymph nodes in patients with  
125 *Streptomyces somaliensis* infection and after stimulation of peripheral blood mononuclear  
126 cells by *M. mycetomatis* antigens [5, 7], while the Th1 response was reported in the acute  
127 phase of infection and healthy endemic controls [8, 9]. Macrophages stimulated with live  
128 conidia of *Pseudallescheria boydii* also induced a Th2 response, whereas hyphae induced a  
129 Th1 response [10]. Experimental infection of nude athymic rats and mice with *Nocardia (N.)*  
130 *asteroides* led to fatal disease dissemination [11, 12]. In addition, T lymphocytes from  
131 previously immunised animals directly killed *N. asteroides* [12, 13]. Moreover, Trevino-  
132 Villarreal and associates [14] reported that *N. brasiliensis* cell wall-associated lipids are  
133 implicated in the development of experimental actinomycetoma and act principally by  
134 inhibiting several microbicidal effects of macrophages, including the inhibition of TNF- $\alpha$   
135 production, phagocytosis, production of nitric oxide (NO), and bacterial killing. Also they  
136 demonstrated that the *N. brasiliensis* wall-associated lipids suppressed the expression of  
137 major histocompatibility complex class II (MHC II), CD80, and CD40 by dendritic cells (DCs)  
138 and strongly induced the production of TGF- $\beta$  by these cells. It has been suggested that

139 pre-existing Th2 environment caused by schistosomiasis promotes the development of  
140 mycetoma as patients with mycetoma were significantly more positive for schistosoma  
141 antibodies than healthy endemic controls [9]. These findings suggested that Th2 like  
142 response and anti-inflammatory/immunosuppressive cytokines could have a negative impact  
143 on mycetoma development and disease progression.

144 IL-1 is a polypeptide which has two forms; IL-1 $\alpha$  and IL-1 $\beta$ . It is involved in the acute-phase  
145 response and is accountable for several alterations that are related to the onset of various  
146 medical disorders [15, 16]. It is demonstrated recently that higher levels of IL-1 $\beta$  cytokine  
147 are strongly associated with surgically treated mycetoma patients, in comparison to those  
148 treated without surgery [17]. It is known that IL-1 $\beta$  is a pro-inflammatory cytokine that is  
149 involved in cell death coordination [18]. IL-1 $\beta$  cytokine is cleaved into the mature, active  
150 form primarily by inflammasome-dependent caspase activity [18]. It is possible that mature  
151 IL-1 $\beta$  secretion by macrophages activates IL-1R1 on macrophages, fibroblasts and epithelial  
152 cells, inducing production of the CXC chemokine CXCL1/KC, which binds to CXCR2 on  
153 neutrophils and mediates recruitment of neutrophils from peripheral blood to stimulate  
154 inflammation at the site of mycetoma invasion. Therefore, these higher levels of IL-1 $\beta$   
155 cytokine advocate a crucial role in *M. mycetomatis* pathogenesis.

156 IL-37, which is a member of the IL-1 family, has emerged as a potent anti-inflammatory  
157 cytokine that suppresses both innate and adaptive immune responses [19]. Its role in human  
158 diseases is not completely understood yet [20]. However, the anti-inflammatory properties of  
159 IL-37 have been associated with inflammatory diseases, such as systemic lupus  
160 erythematosus (SLE) [21], and inflammatory bowel disease [22]. It has been reported that  
161 IL-37 is negatively associated with pro-inflammatory cytokines such as IL-1 $\beta$ , IL-6, IL-17,

162 TNF- $\alpha$  and IFN- $\gamma$  in peripheral blood mononuclear cells (PBMCs) of patients with  
163 degenerative intervertebral discs [23] and Graves' disease (GD) [24]. IL-37 protein level in  
164 PBMCs and dendritic cells (DCs) is up-regulated when stimulated by Toll-like receptor (TLR)  
165 ligands or pro-inflammatory cytokines [25]. In vitro, overexpression of IL-37 in macrophages  
166 or epithelial cells greatly inhibits the production of major pro-inflammatory cytokines such as  
167 TNF- $\alpha$ , IL-1 $\alpha$ , IL-1 $\beta$ , IL-6, IFN- $\gamma$  and macrophage inflammatory protein 2 [25, 26]. In vivo, IL-  
168 37 transgene protects mice from lipopolysaccharide-induced shock and chemical-induced  
169 colitis [19, 27]. IL-37 interferes with the innate protective anti-Candida host response by  
170 reducing the production of pro-inflammatory cytokines and suppressing neutrophil  
171 recruitment in response to Candida infection, resulting in increased susceptibility to  
172 disseminated candidiasis [28]. Moreover, IL-37 markedly reduced inflammasome activation  
173 and disease severity in murine aspergillosis [29]. In addition to its role in innate immunity; IL-  
174 37 plays a pivotal role in regulating adaptive immunity by inducing regulatory T ( $T_{reg}$ ) cells  
175 and impairing activation of effector T-cell responses [30]. To our knowledge, there has been  
176 no study to report the relationship between IL-37 and mycetoma pathogenesis so far.

177 Interleukin-12 (IL-12) is frequently denoted as a B cell cytokine, although it is mainly formed  
178 by innate immune cells, comprising epithelial cells, DCs, and macrophages [31]. IL-12 is a  
179 multimer that plays a fundamental role in immune regulation and is extensively involved in  
180 infections. It binds to the heterodimeric IL-12 receptor, which is principally present in T cells  
181 and on natural killer (NK) cells [31]. IL-12 induces Th1 responses [32], which consequently  
182 increase the cytotoxic cytokines, in addition to IFN- $\gamma$  by T cells [31, 32].

183 IL-35 is a recently identified heterodimeric cytokine which belongs to the IL-12 cytokine  
184 family, composed of the subunits of IL-27;  $\beta$  chain Epstein-Barr-virus (EBV)-induced gene 3



185 (Ebi3) and IL-12  $\alpha$  chain p35 [33, 34]. IL-35 is a potent immunosuppressive cytokine  
186 produced by T<sub>regs</sub>, regulatory B cells (B<sub>regs</sub>) [35], DCs [36], and to a lesser extent, by  
187 endothelial cells, smooth muscle cells, and monocytes [37]. The biological effect of IL-35 is  
188 poorly understood. However IL-35 is recognised as a typical anti-inflammatory cytokine, and  
189 the predominant mechanism of suppression is associated with its ability to suppress T cell  
190 proliferation and effector functions [33, 38]. Given the direct immunosuppressive effect of IL-  
191 35, many studies have been conducted to evaluate its role in the development of several  
192 diseases. IL-35 can suppress several types of chronic inflammatory diseases such as  
193 inflammatory bowel disease [26], and decreased the severity of collagen-induced arthritis in  
194 animals via enhancement of IL-10 production [39] and suppression of Th17 cells [40]. In an  
195 asthma model, intra-tracheal instillation of IL-35 decreased disease severity by diminishing  
196 the Th2 cell counts [41] and by reducing the production of IL-17 [42]. In bacterial infections,  
197 Shen and associates [35] found that mice without IL-35 expression demonstrated an  
198 improved resistance to infection with the intracellular bacterial pathogen *Salmonella*  
199 *typhimurium*. In addition, IL-35 has been increased in the serum of adults and children with  
200 sepsis, and administration of anti-IL-35 p35 antibodies diminished dissemination of the  
201 bacteria in septic animals [43]. Similarly, tuberculous patients exhibited an increase in serum  
202 IL-35 and in mRNA expression of both subunits of IL-35 (p35 and EBI3) in white blood cells  
203 and peripheral blood mononuclear cells [44]. However, the role of IL-35 in mycetoma  
204 pathogenesis has not been highlighted yet.

205 With this background, this study was set to determine the IL-1 cytokine family (IL-1 $\beta$ , IL-37)  
206 and IL-12 cytokine family (IL-12, IL-35) circulating levels of in patients infected with *M.*

207 *mycetomatis*, and to explore the association between the cytokine levels and the patients'  
208 demographic characteristics.

209

## 210 **Materials and Methods**

### 211 **Study population**

212 This case-control study was conducted at the Mycetoma Research Centre, Soba University  
213 Hospital, University of Khartoum, Sudan. After a written informed consent, blood samples  
214 were taken from patients and a matched control population living in the mycetoma endemic  
215 areas of Sudan between 2015 and 2016. Samples collection was previously described in  
216 details by Nasr and associates, 2016 [17].

217 In this study 140 individuals were enrolled; 49 (35%) were females, and 91 (65%) were  
218 males with an overall median age of 25 years (range 12–70 years). Seventy patients were  
219 infected with *M. mycetomatis*. The study population was divided into two groups; group I:  
220 healthy controls [n = 70; median age 25 years (range 12 to 70 years)]. Group II: mycetoma  
221 patients [n = 70 patients; median age 25 (range 13 to 70 years)].

222 The diagnosis of eumycetoma was established by various techniques, and that included  
223 imaging, molecular and histopathological techniques, and grain culture [1, 45]. Surgical  
224 biopsies are obtained by a wide local incision under anaesthesia and appropriate surgical  
225 conditions as part of the routine patients' treatment protocol [45].

226 After medical examination, healthy controls were selected from blood bank donors or  
227 healthy volunteers to match the patient's birthplace geographically. All healthy controls were  
228 questioned for acute or chronic infectious diseases, autoimmune family history and genetic  
229 disorders. Then all study participants gave their informed written consent.

## 230 **Sample collection**

231 One hundred µl of blood was collected on Whatman qualitative filter paper, Grade 1, circles,  
232 diam. 42.5 mm (Sigma-Aldrich Chemical Co., St. Louis, MO, USA) for the determination of  
233 cytokines. The use of filter paper dried whole blood spots (DBS) for specimen collection was  
234 preferred to facilitate collection, storage and transportation of specimens and it is in line with  
235 the World Health Organization recommendations and also used in several previous studies  
236 [46-48]. Sera were extracted from filter-paper samples as described previously in details  
237 [17].

238

## 239 **IL-1β, IL-37, IL-12 and IL-35 measurement**

240 IL-1β, IL-37, and IL-12 were measured in the sera using commercially available enzyme-  
241 linked immunosorbent assay (ELISA) kits (abcam®, Cambridge, UK). Serum levels of IL-35  
242 were estimated using a sandwich ELISA commercial kit (Colorful Gene Biological  
243 Technology, Wuhan, China). Cytokine assays were performed in duplicates according to the  
244 manufacturers' protocols. The sensitivity of Human ELISA kits for IL-1β, IL-37, IL-12 and IL-  
245 35 cytokines was 0.5 pg/ml.

246

## 247 **Statistical analysis**

248 The data were managed by SPSS version 24.0 statistical software for Windows (IBM©  
249 SPSS© statistics) and appropriate statistical tests were used. The results are expressed as  
250 mean ± standard deviation (SD) or median with interquartile range (IQR). Spearman  
251 correlation test was used to evaluate the associations between serum IL-37 levels and  
252 laboratory values as well as serum cytokine levels. For non-parametric data, comparisons

253 between the groups were performed using the Kruskal–Wallis test. One-way ANOVA was  
254 used for parametric data. General linear models were used to assess the risk factors for  
255 circulating IL-37 pg/ml and IL-35 among mycetoma patients with different disease duration  
256 and lesions size of mycetoma infection adjusted with other variables. A test with a  $p$ -value  
257  $<0.05$  was considered statistically significant.

258

### 259 **Ethical considerations**

260 This study was approved by the Ethics Committee of Soba University Hospital, Khartoum,  
261 Sudan. Written informed consent was taken from all the participants before enrolment in the  
262 study. The work described here was performed in accordance with the Declaration of  
263 Helsinki [49].

264

265

266

### 267 **Results**

268 This study included 70 confirmed mycetoma patients and 70 healthy controls; gender and  
269 age-matched. Fifty-six patients (80%) were males and 14 (20%) were females. Their ages  
270 ranged between 12 and 77 years, and the median age was 25.5 years. The common age  
271 group [22 (31.4%)] was 19-24 years, 17 (22.9%) in the age group (25-29) years, and nine  
272 (12.9%) were 40 years old or more (Table 1). In this study, a total of 40 subjects [23 patients  
273 (32.9%) and 17 (24.3%) healthy controls] were domestic workers, 40 individuals (17 (24.3%)  
274 patients and 23 (32.9%) healthy controls] were students and 24 individuals [12 (17.1%)  
275 patients and 12 (17.1%) healthy controls] were farmers. Due to the prolonged illness and

276 disability, 12 (17.1%) patients had lost their jobs while only five (7.1%) healthy controls were  
277 unemployed. A total of six individuals [5 (7.1%) patients and 1(1.4%) healthy controls] of the  
278 patients were housewives. A total of 13 individuals [1(1.4%) patients and 12 (17.1%) healthy  
279 controls] were employers (Table 1).

280

281

282 **Correlations between cytokine levels (IL-1 $\beta$ , IL-37, IL-12 and IL-35) stratified by the**  
283 **lesion diameter among mycetoma patients and control group**

284 The levels of cytokines (IL-1 $\beta$ , IL-37, IL-12 and IL-35) were constitutively correlated among  
285 mycetoma patients with different lesions diameters. The levels of IL-1 $\beta$  were constitutively  
286 positively correlated with IL-12 and lesions diameter, (Table 2). On the other hand, the  
287 levels of cytokine IL-1 $\beta$  were constitutively negatively correlated with IL-37 and IL-35, (Table  
288 2). Furthermore, the levels of cytokine IL-37 were constitutively positively correlated with IL-  
289 35 (Table 2). However, the levels of cytokine IL-37 and IL-35 were constitutively negatively  
290 correlated with IL-12 (Table 2).

291

292

293 **Correlations between cytokine levels (IL-1 $\beta$ , IL-37, IL-12 and IL-35) stratified by the**  
294 **disease duration and control group**

295 In the patients' group, the levels of cytokines (IL-1 $\beta$ , IL-37, IL-12 and IL-35) were  
296 constitutively correlated with the duration of mycetoma infection. Levels of IL-1 $\beta$  showed a  
297 consistent positive correlation with IL-12 and negative correlation with IL-37 and IL-35,  
298 (Table 3). Whereas, levels of IL-37 were constitutively positively correlated with IL-35 (Table

299 3). However, the levels of IL-37 and IL-35 were constitutively negatively correlated with IL-  
300 12, (Table 3).

301 **Analysis of the serum levels of IL-1 $\beta$ , IL-37, IL-12 and IL-35 within the different lesion**  
302 **diameters among mycetoma patients and control groups**

303 Circulating serum cytokine levels were determined in all mycetoma patients and were  
304 compared between the different lesion diameters among mycetoma patients and healthy  
305 controls. Overall, there was a significant difference in the levels of all studied cytokines  
306 between the four groups (Three levels of lesion diameter and the healthy controls), (Table  
307 4). Distribution of IL-1 $\beta$  levels has decreased dramatically with lesion diameter [for lesion  
308 diameter  $\leq$  5 cm: the mean  $\pm$  SD (3.39  $\pm$  1.07); for 5-10 cm: (2.32  $\pm$  0.05); for  $\geq$  10 cm: (2.08  
309  $\pm$  0.11),  $p$ -value  $<$  0.001)]. However, the circulating serum levels of IL-37 were significantly  
310 increased with lesion diameter [for lesion diameter  $\leq$  5 cm: the mean  $\pm$  SD (107.92  $\pm$  5.96);  
311 for 5-10 cm: (141.45  $\pm$  12.96) and for  $\geq$  10 cm: (193.20  $\pm$  15.01),  $p$ -value  $<$  0.001)] (Table 4).  
312 Our results showed a significant reduction of circulating IL-12 levels versus lesion diameter  
313 [for lesion diameter  $\leq$  5 cm: the mean  $\pm$  SD (25.22 $\pm$ 3.34); for 5-10 cm: (14.45 $\pm$  3.32); for  $\geq$   
314 10 cm: (9.65  $\pm$  0.36),  $p$  value  $<$  0.001)], (Table 4). Circulating levels of IL-35 were  
315 significantly increased with increasing lesions' diameter [for lesion diameter  $\leq$  5 cm: the  
316 mean  $\pm$  SD (255.15  $\pm$  1.72); for 5-10 cm: (263.23  $\pm$  3.26);  $\geq$  10 cm: (449.71  $\pm$  22.2), ( $p$  value  
317  $<$  0.001)], (Table 4).

318

319

320 **Analysis of the serum levels of IL-1 $\beta$ , IL-37, IL-12 and IL-35 among mycetoma patients**  
321 **stratified by different durations of mycetoma infection compared to the control group**

322 Circulating levels of IL-1 $\beta$  had significantly decreased with increasing disease duration [( $\leq$  1  
323 year; median = 2.3 pg/ml), (2-4 years; median = 2.2 pg/ml) and ( $\geq$  5 years; median = 2.2  
324 pg/ml)],  $p$  value = 0.017 (Table 5). Serum levels of IL-12 dramatically decreased with the  
325 increase in disease duration [( $\leq$  1 year; median = 12.5 pg/ml), (2-4 years; median = 10.2  
326 pg/ml) and ( $\geq$  5 years; median = 9.8 pg/ml)] and  $p$  value < 0.001), (Table 5). However,  
327 circulating levels of IL-37 were positively increased with different durations of mycetoma  
328 infection [( $\leq$  1 year; median = 145 pg/ml), (2-4 years; median = 178 pg/ml) and ( $\geq$  5 years;  
329 median = 185.2 pg/ml)],  $p$  value <0.001, (Table 5). Similarly, serum levels of IL-35 were also  
330 significantly increased with increasing duration of mycetoma infection [( $\leq$  1 year; median =  
331 262.5 pg/ml), (2-4 years; median = 423.5 pg/ml) and ( $\geq$  5 years; median = 436 pg/ml)],  $p$   
332 value < 0.001, (Table 5).

333

### 334 **Risk factors for increased IL-37 levels in mycetoma patients with different lesion** 335 **diameters**

336 The analysis of the risk factors of higher levels of IL-37 in patients of mycetoma showed a  
337 significant negative association with IL-1 $\beta$ , where a unit increment in IL-1 $\beta$  decreases the  
338 levels of IL-37 by 9.1 pg/ml,  $p$ -value = 0.008, (Table 6). Serum levels of IL-37 among the  
339 patients with lesion diameter  $\leq$  5 cm and 5-10 cm have significantly lower on average by  
340 75.4% and 52.6%, respectively, compared to patients with lesion diameter  $\geq$  10 cm  
341 (reference group). Serum levels of IL-37 among the patients of mycetoma showed no  
342 significant difference between males and females,  $p$ -value = 0.176, (Table 6). Circulating  
343 levels of IL-37 significantly decreased with increasing age groups [(19-24 years);  $p$ -value =  
344 0.010 and (30- 39) years;  $p$ -value = 0.029)] (Table 6).

345

346 **Risk factors for increasing circulating IL-35 and the patients' demographic**  
347 **characteristics and lesion diameters**

348 The analysis of the risk factors of higher serum levels of IL-35 in mycetoma patients showed  
349 no significant association with IL-12,  $p$ -value = 0.182, (Table 7). Circulating levels of IL-35  
350 among the patients with lesions' diameter  $\leq$  5 cm and 5-10 cm were significantly decreased,  
351  $p$ -value  $<$  0.001) by 174.4% and 176.5, respectively, compared to patients with lesion  
352 diameter  $\geq$  10 cm (reference group) (Table 7).

353 Serum levels of IL-35 among mycetoma patients showed no significant difference between  
354 males and female,  $p$ -value = 0.575, (Table 7). Circulating levels of IL-35 showed no  
355 significant association with the different age groups and different types of antifungal  
356 medication given (Table 7).

357

358 **Risk factors for circulating IL-37 and the patients' demographic characteristics and**  
359 **disease duration**

360 The analysis of the risk factors of higher circulatory levels of IL-37 in patients of mycetoma  
361 showed a significant negative association with IL-1 $\beta$ , where a unit increment in IL-1 $\beta$   
362 decreases the levels of IL-37 by 35.28 pg/ml,  $p$   $<$  0.001 (Table 8). Levels of IL-37 among  
363 patients with a disease duration  $\leq$  one year had significantly decreased on average by 18.45  
364 compared to patients with a disease duration  $\geq$  5years (reference group). However, there  
365 was no significant difference in levels of IL-37 between patients with infection duration 2-4  
366 years and  $\geq$  five years,  $p$ -value = 0.793. Also, serum levels of IL-37 among mycetoma  
367 patients showed no significant difference between males and females,  $p$ -value = 0.627



368 (Table 8). Furthermore, the circulating levels of IL-37 had significantly decreased with  
369 increasing age groups [(19-24 years;  $p$ -value = 0.0100), 25-29 years;  $p$ -value =0.030 and  
370 (30- 39) years;  $p$ -value = 0.022)] (Table 8). Interestingly, levels of IL-37 among mycetoma  
371 patients showed a statistically significant difference between Itraconazole compared to  
372 Ketoconazole,  $p < 0.001$ , (Table 8).

373

#### 374 **Risk factors for circulating IL-35 among mycetoma patients.**

375 The analysis of the risk factors of higher levels of IL-35 in patients of mycetoma revealed a  
376 significant negative association with IL-12; as a unit increment in IL-12 decreases the levels  
377 of IL-35 by 8.99 pg/ml,  $p$ -value  $< 0.001$  (Table 9). Levels of IL-35 among the patients with a  
378 mycetoma with a disease duration of  $\leq 1$  year had significantly decreased,  $p$  value= 0.002),  
379 on average by 41.82 pg/ml compared to patients with a disease duration  $\geq 5$ years  
380 (reference group) (Table 9). However, patients with an infection duration of 2-4 years and  $\geq$   
381 five years showed no significant difference in IL-35 levels,  $p$ -value = 0.391. Furthermore,  
382 there was no significant difference ( $p$ -value = 0.49) in IL-35 levels between male and female  
383 mycetoma sufferers (Table 9). Additionally, the circulating levels of IL-35 showed no  
384 significant association with the different age groups (Table 9). Interestingly, treatment with  
385 Itraconazole significantly increased circulating levels of IL-35 among mycetoma patients  
386 compared to treatment with Ketoconazole,  $p$ -value  $<0.001$ , (Table 9).

387

388

389

390

## 391 **Discussion**

392 Although mycetoma represents a major health problem in many tropical and subtropical  
393 areas, there are no prevention or control measures for this neglected disease [22, 23]. In  
394 mycetoma endemic areas, most individuals have antibodies against the causative agents.  
395 However only a few develop the disease [4]. Few researchers believed that patients who  
396 develop mycetoma seem to be deficient in their cell-mediated immunity [6]. Hence, we  
397 aimed to investigate the profiles of the pro-inflammatory (IL-1 $\beta$  and IL-12) and the anti-  
398 inflammatory immunosuppressive (IL-37 and IL-35) cytokines among mycetoma patients  
399 and their association with disease characteristics. As far as we know, this is the first study  
400 addressing the relation between immunosuppressive cytokines and mycetoma infection. Our  
401 data showed that eumycetoma patients presented higher circulating levels of IL-1 $\beta$ , IL-12,  
402 IL-37 and IL-35 compared to controls. Moreover, serum levels of IL-1 $\beta$  and IL-12 were  
403 significantly decreased with increasing lesions' diameter and disease duration, whereas  
404 levels of IL-37 and IL-35 were significantly higher with increasing lesions' diameter and  
405 disease duration. These findings indicate that immunosuppressive cytokines like IL-37 and  
406 IL-35, which could suppress cell-mediated immune responses, may have a negative impact  
407 on the disease progression.

408 Data of the current study clearly showed the serum levels of IL-1 $\beta$  and IL-12 in eumycetoma  
409 patients with different lesion size and disease duration were positively correlated with each  
410 other, and negatively correlated with IL-37. It has been demonstrated that the first line of the  
411 innate immune response against mycetoma infection is by phagocytes, from which  
412 macrophages represent the major phagocytic cells [50]. In general, protective immunity to  
413 fungal infections [51] involves activation of Toll-like receptors (TLRs) generating

414 inflammatory cytokines through pattern-recognition receptors and pathogen-associated  
415 molecular patterns [52, 53]. IL-1 $\beta$  and other pro-inflammatory cytokines are produced early  
416 in response to fungal infections and promote phagocytosis and other means of the innate  
417 immune response [54, 55]. Following inflammatory stimuli, several cell types including  
418 immune and non-immune cells produce IL-37, as a protective mechanism to prevent  
419 runaway inflammation and excessive tissue damage [56]. IL-37 directly inhibits generation of  
420 pro-inflammatory cytokines and down-regulates macrophage cytokine release, and therefore  
421 innate immunity [57, 58]. Moreover, IL-37 induces macrophages towards an M2-like  
422 phenotype [59]. M1 macrophages are the most critical effector cells in the innate immune  
423 defence system and are characterised by high expression levels of iNOS, subsequent NO  
424 production and secretion of pro-inflammatory cytokines, such as IL-1 $\beta$  and IL-12 [60].  
425 However, M2 macrophages secrete anti-inflammatory cytokines, such as IL-10 [61] and  
426 express arginase 1, which inhibits NO production, thus rendering these cells ineffective in  
427 killing infectious agents including fungal agents [61, 62]. Furthermore, DCs expressing IL-37  
428 secreted higher levels of IL-10 and reduced levels of IL-1 $\beta$  and IL-12. Therefore, the  
429 presence of IL-37 in DCs impairs their function in prime T cells and promotes their ability to  
430 induce Treg cells that produce IL-10, which is also a potent anti-inflammatory cytokine [30].

431  
432 Our results have consistently shown higher circulatory levels of IL-37 in patients of  
433 mycetoma which is negatively associated with IL-1 $\beta$ , as a unit increment in IL-1 $\beta$  decreases  
434 the levels of IL-37 by 35.28 pg/ml. Based on the aforementioned data, we can speculate that  
435 IL-37 could play a role in damping inflammatory response in mycetoma infection which leads  
436 to disease progression and this is not in the patient's favour.

437 In the current work, the circulating levels of IL-1 $\beta$  and IL-12 in eumycetoma patients with  
438 different lesion size and disease duration were negatively correlated with IL-35; whereas  
439 serum levels of IL-35 were increased with increasing lesion size and disease duration, and  
440 levels of IL-1 $\beta$  and IL-12 simultaneously decreased. This may probably be an attempt to  
441 dampen ongoing inflammation. Both IL-1 $\beta$  and IL-12 have a pivotal role in inflammatory and  
442 cell-mediated immune responses. Macrophages, Th1 and cytotoxic T-cells (CTLs), which  
443 constitute the main component of cell-mediated immunity, play an important role in the  
444 protective immunity against mycetoma infection [2]. As fatal dissemination of *N. asteroides*  
445 infection occurs in nude athymic rats and mice [11, 12], T cells from previously immunised  
446 animals are able to kill *N. asteroides* in new infections [12, 13]. IL-35 could suppress Th1  
447 and macrophage responses [63], whereas deficiency in IL-35 increases macrophage's  
448 activation and induces Th1 responses [35, 63]. The increased immunity found in mice  
449 lacking IL-35 is associated with higher activation of macrophages and inflammatory T cells,  
450 as well as enhancing the function of antigen-presenting cells [35]. In another infection  
451 model, Cao and his co-workers reported higher serum levels of IL-35 in septic patients  
452 compared to controls, and IL-35 gradually increased with increased sepsis severity.

453  
454 Moreover, administration of anti-IL-35 antibodies diminished dissemination of the bacteria in  
455 septic animals and enhanced local neutrophil recruitment with increases in inflammatory  
456 cytokines and chemokines production [43]. Furthermore, IL-35 suppressed the proliferation  
457 of antigen-specific CTLs and IFN- $\gamma$  production [64]. Our data revealed that higher levels of  
458 IL-35 in patients with mycetoma is negatively associated with IL-12, where a unit increment  
459 in IL-12 decreases the levels of IL-35 by 8.99 pg/ml. This finding indicates that IL-35 may be

460 a risk factor for mycetoma infection and have a negative role in the clinical presentation of  
461 the disease.

462 Prevalence of mycetoma infection may vary with age. Data from this study showed a  
463 variation of mycetoma prevalence with age; 74.3 % of the patients' age was 19-39 years.  
464 This finding is consistent with previous studies which reported that mycetoma mostly affects  
465 ages between 20 and 40 years. Our data also demonstrated that mycetoma infection was  
466 predominant in males, as the male to female ratio in patient's group was 4:1. This finding is  
467 running parallel with the results of a previous study which demonstrated that in a tertiary  
468 facility in Khartoum, Sudan, the male to female ratio is 4:1, whereas at the primary care level  
469 in White Nile State, Sudan, the reported male to female ratio was 1.6:1. Another studies  
470 reported that male to female ratios in mycetoma infections was in the range of 1.6-6.6:1 [2].  
471 The predominance of mycetoma in males may be attributed to increased exposure in men  
472 who engage in different manual labours including agricultural work. Moreover, the influence  
473 of sex hormones might have a role in susceptibility to mycetoma infections and disease  
474 progression [4, 65].

475 Our data showed that about, 50 % of the patients have lesion diameter more than 10 cm.  
476 This result reflected that most mycetoma patients tend to present late with massive lesions.  
477 This finding could be attributed to the nature of mycetoma which is usually painless and  
478 slowly progressive. In addition, the lack of health facilities in endemic areas, the low socio-  
479 economic status of the affected patients and their poor health education [1, 4, 66] are  
480 amongst the reasons why the current treatment of mycetoma is suboptimal, characterised  
481 by low cure rates and frequent recurrence often leading to amputation [67, 68]. However,

482 clinical experience shows that early and small mycetoma lesions are associated with good  
483 outcome and prevent severe complications of the disease.

484 One of the remarkable findings of the current study is the significant increase of IL-37 and  
485 IL-35 levels with Itraconazole treatment compared to the Ketoconazole. A previous study by  
486 Friccius and colleagues suggested that the dose of 10 µg/ml Itraconazole leads to strong  
487 inhibition of the cytokines IL-2, IL-4, IL-9 and IFN-γ and slight inhibition of TNF-α cytokine  
488 production in PBMC after 6 and 24 hours of incubation. These results demonstrate that IL-  
489 35 and IL-37 can be one of the underline factors associated with inhibition of the cytokines  
490 related to Itraconazole [69].

491  
492 In conclusion, our study revealed that the levels of IL-37 and IL-35 were consistently  
493 positively correlated with different diameters of mycetoma lesions as well as its duration.  
494 However, the levels of IL-1β and IL-12 were consistently negatively correlated with different  
495 diameters of lesions and the duration of mycetoma infection. The analysis of the risk factors  
496 of higher circulatory levels of IL-37 in patients of mycetoma showed a negative significant  
497 association with IL-1β cytokine, where a unit increment in IL-1β will decrease the levels of  
498 IL-37 by 35.28 pg/ml. Levels of IL-37 among the patients with a mycetoma infection duration  
499 ≤ one year had significantly decreased on average by 18.45 compared to patients with a  
500 mycetoma infection duration ≥ 5years (reference group). Furthermore, the risk factors of  
501 higher levels of IL-35 in patients of mycetoma revealed a significant negative association  
502 with IL-12, as a unit increment in IL-12 decreases the levels of IL-35 decrease by 8.99 pg/ml  
503  $p < 0.001$ . Levels of IL-35 among the patients with a mycetoma infection duration ≤ 1 year  
504 had significantly decreased ( $p$ -value = 0.002) on average by 41.82 compared to patients with

505 a mycetoma infection duration  $\geq$  5years (reference group). More investigations are needed  
506 to explore the mechanism by which IL-35 and IL-37 contribute in the mycetoma infection  
507 outcomes. This will help in understanding the role of these cytokines IL-35 and IL-37 in the  
508 pathogenesis of mycetoma, and may exploit it as a potential therapeutic target to prevent  
509 mycetoma diseases recurrence.

510

### 511 **Acknowledgements**

512 The authors are grateful to the patients, controls and their families and the staff at the  
513 Mycetoma Research Centre at Soba University Hospital, University of Khartoum-Sudan, for  
514 their continued collaboration and generous hospitality during a decade of samples  
515 collection. The authors are thankful to Dr Hamza A., Dundee University, the UK for  
516 improving the English language and proofreading the Manuscript.

517

518

### 519 **Supporting Information Legends**

520 STROBE checklist

521

522

523

524

525

### 526 **References**

527

- 528 1. Fahal A, Mahgoub ES, Hassan AME, Abdel-Rahman ME. Mycetoma in the Sudan:  
529 an update from the mycetoma research centre, University of Khartoum, Sudan.  
530 PLoS Negl Trop Dis. 2015; 9: e0003679.
- 531 2. Zijlstra EE, van de Sande WWJ, Welsh O, Mahgoub ES, Goodfellow M, Fahal AH.  
532 Mycetoma: a unique neglected tropical disease. Lancet Infect Dis. 2016; 16(1):100-  
533 112.
- 534 3. Fahal AH, Hassan MA. Mycetoma. Br J Surg.1992; 79(11): 1138-1141.
- 535 4. Vera-Cabrera L, Salinas-Carmona MC, Waksman N, Messeguer-Pérez J, Ocampo-  
536 Candiani J, Welsh O. Host defenses in subcutaneous mycoses. Clin Dermatol.  
537 2012; 30(4):382-8.
- 538 5. El Hassan AM, Fahal AH, Ahmed AO, Ismail A, Veress B. The immunopathology of  
539 actinomycetoma lesions caused by *Streptomyces somaliensis*. Trans R Soc Trop  
540 Med Hyg. 2001;95(1):89-92.
- 541 6. Mahgoub ES, Gumaa SA, El Hassan AM. Immunological status of mycetoma  
542 patients. Bull Soc Pathol Exot Filiales. 1977;70(1):48-54.
- 543 7. Al Dawi AF, Mustafa MI, Fahal AH, Hassan AME, Bakhiet SM, Mahgoub ES, et al.  
544 The association of HLA-DRB1 and HLA-DQB1 alleles and the occurrence of  
545 eumycetoma in Sudanese patients. Khartoum Medical Journal.2013; 6(3):923 - 929.
- 546 8. Meester I, Rosas-Taraco AG, Salinas-Carmona MC. Retnla down-regulation and IL-  
547 13-rich environment correlate with inflammation severity in experimental  
548 actinomycetoma by *Nocardia brasiliensis*. Pathog Dis. 2013;67(3):214-20.



- 549 9. van Hellemond JJ, Vonk AG, de Vogel C, Koelewijn R, Vaessen N, Fahal AH, et al.  
550 Association of Eumycetoma and Schistosomiasis. PLoS Negl Trop Dis 2013; 7(5):  
551 e2241.
- 552 10. Figueiredo RT, Fernandez PL, Dutra FF, González Y, Lopes LC, Bittencourt VC, et  
553 al. TLR4 recognizes *Pseudallescheria boydii* conidia and purified rhamnmannans.  
554 J Biol Chem. 2010; 285(52):40714-23.
- 555 11. Salinas-Carmona MC, Torres-López E. Role of passive humoral immunity in  
556 experimental mycetoma by *Nocardia brasiliensis*. Ann N Y Acad Sci. 1996 ;797:263-  
557 5.
- 558 12. Welsh O, Vera-Cabrera L, Welsh E, Salinas MC. Actinomycetoma and advances in  
559 its treatment. Clin Dermatol. 2012;30(4):372-81.
- 560 13. Deem RL, Doughty FA, Beaman BL. Immunologically specific direct T lymphocyte-  
561 mediated killing of *Nocardia asteroides*. J Immunol. 1983;130(5):2401-6.
- 562 14. Trevino-Villarreal JH, Vera-Cabrera L, Valero-Guillén PL, Salinas-Carmona MC.  
563 *Nocardia brasiliensis* cell wall lipids modulate macrophage and dendritic responses  
564 that favor development of experimental actinomycetoma in BALB/c mice. Infect  
565 Immun. 2012; 80(10):3587-601.
- 566 15. Di Iorio A, Ferrucci L, Sparvieri E, Cherubini A, Volpato S, Corsi A, et al. Serum IL-  
567 1beta levels in health and disease: a population-based study. Cytokine. 2003;  
568 22(6):198-205.
- 569 16. Paulus WJ. Cytokines and heart failure. Heart Fail Monit. 2000; 1(2):50-6.

- 570 17. Nasr A, Abushouk A, Hamza A, Siddig E, Fahal AH. Th-1, Th-2 Cytokines Profile  
571 among *Madurella mycetomatis* Eumycetoma Patients. PLoS Negl Trop Dis.2016;  
572 10(7): e0004862.
- 573 18. Ganesan S, Rathinam VAK, Bossaller L, Army K, Kaiser WJ, Mocarski ES, et al.  
574 Caspase-8 modulates dectin-1 and complement receptor 3-driven IL-1beta  
575 production in response to beta-glucans and the fungal pathogen, *Candida albicans*.  
576 J Immunol. 2014;193(5):2519-2530.
- 577 19. Nold MF, Nold-Petry CA, Zepp JA, Palmer BE, Bufler P, Dinarello AC. IL-37 is a  
578 fundamental inhibitor of innate immunity. Nat Immunol. 2010; 11(11): 1014–1022.
- 579 20. Allam G, Mohamed IA, Alswat KA, Abbadi SH, Nassif R, Alharthi BJ, et al.  
580 Association of IL-37 gene polymorphisms with susceptibility to tuberculosis in Saudi  
581 population. Microbiol Immunol. 2016;60(11):778-786.
- 582 21. Ye L, Ji L, Wen Z, Zhou Y, Hu D, Li Y, et al. IL-37 inhibits the production of  
583 inflammatory cytokines in peripheral blood mononuclear cells of patients with  
584 systemic lupus erythematosus: its correlation with disease activity. J Transl Med.  
585 2014; 12:69.
- 586 22. Li Y, Wang Y, Liu Y, Wang Y, Zuo X, Li Y, et al. The possible role of the novel  
587 cytokines il-35 and il-37 in inflammatory bowel disease. Mediators Inflamm.  
588 2014;2014:136329.
- 589 23. Wan ZY, Sun Z, Song F, Chen YF, Zhang WL, Wang HQ, et al. Downregulated  
590 interleukin 37 expression associated with aggravation of intervertebral disc  
591 degeneration. Int J Clin Exp Pathol. 2014; 7(2):656-62.

- 592 24. Li Y, Wang Z, Yu T, Chen B, Zhang J, Huang K, et al. Increased expression of IL-37  
593 in patients with Graves' disease and its contribution to suppression of  
594 proinflammatory cytokines production in peripheral blood mononuclear cells. PLoS  
595 One. 2014;9(9):e107183.
- 596 25. Boraschi D, Lucchesi D, Hainzl S, Leitner M, Maier E, Mangelberger D, et al. IL-37:  
597 a new anti-inflammatory cytokine of the IL-1 family. Eur Cytokine Netw.  
598 2011;22(3):127-47.
- 599 26. Banchereau J, Pascual V, O'Garra A. From IL-2 to IL-37: the expanding spectrum of  
600 anti-inflammatory cytokines. Nat Immunol.2012; 13: 925-931.
- 601 27. McNamee EN, Masterson JC, Jedlicka P, McManus M, Grenz A, Collins CB, et al.  
602 Interleukin 37 expression protects mice from colitis. Proc Natl Acad Sci U S A.  
603 2011;108(40):16711-6.
- 604 28. van de Veerdonk FL, Gresnigt MS, Oosting M, van der Meer JW, Joosten LA, Netea  
605 MG, et al. Protective host defense against disseminated candidiasis is impaired in  
606 mice expressing human interleukin-37. Front Microbiol. 2014; 5: 762.
- 607 29. Moretti S, Bozza S, Oikonomou V, Renga G, Casagrande A, Iannitti RG, et al. IL-37  
608 Inhibits Inflammasome Activation and Disease Severity in Murine Aspergillosis.  
609 PLoS Pathog. 2014; 10(11): e1004462..
- 610 30. Luo Y, Cai X, Liu S, Wang S, Nold-Petry CA, Nold MF, et al. Suppression of  
611 antigen-specific adaptive immunity by IL-37 via induction of tolerogenic dendritic  
612 cells. Proc Natl Acad Sci U S A. 2014;111(42):15178-83.

- 613 31. Ashman RB, Vijayan D, Wells CA. IL-12 and related cytokines: function and  
614 regulatory implications in *Candida albicans* infection. *Clin Dev Immunol.*  
615 2011;2011:686597.
- 616 32. O'Garra A, Murphy KM. From IL-10 to IL-12: how pathogens and their products  
617 stimulate APCs to induce T(H)1 development. *Nat Immunol.* 2009;10(9):929-32.
- 618 33. Collison LW, Workman CJ, Kuo TT, Boyd K, Wang Y, Vignali KM, et al. The  
619 inhibitory cytokine IL-35 contributes to regulatory T-cell function. *Nature.* 2007;  
620 450(7169):566-9.
- 621 34. Vignali DA, Kuchroo VK. IL-12 family cytokines: immunological playmakers. *Nat*  
622 *Immunol.* 2012;13(8):722-8.
- 623 35. Shen P, Roch T, Lampropoulou V, O'Connor RA, Stervbo U, Hilgenberg E, et al. IL-  
624 35-producing B cells are critical regulators of immunity during autoimmune and  
625 infectious diseases. *Nature.* 2014; 507(7492):366-370.
- 626 36. Dixon KO, der Kooij SW, Vignali DA, Kooten C. Human tolerogenic dendritic cells  
627 produce IL-35 in the absence of other IL-12 family members. *Eur J Immunol.*  
628 2015;45(6):1736-47.
- 629 37. Choi J, Leung PS, Bowlus C, Gershwin ME. IL-35 and autoimmunity: a  
630 comprehensive perspective. *Clin Rev Allergy Immunol.* 2015;49(3):327-32.
- 631 38. Tirotta E, Duncker P, Oak J, Klaus S, Tsukamoto MR, Gov L, et al. Epstein-Barr  
632 virus-induced gene 3 negatively regulates neuroinflammation and T cell activation  
633 following coronavirus-induced encephalomyelitis. *J Neuroimmunol.* 2013; 254(1-  
634 2):110-6.

- 635 39. Kochetkova I, Golden S, Holderness K, Callis G, Pascual DW. IL-35 stimulation of  
636 CD39+ regulatory T cells confers protection against collagen II-induced arthritis via  
637 the production of IL-10. *J Immunol.* 2010;184(12):7144-53.
- 638 40. Niedbala W, Wei Xq, Cai B, Hueber AJ, Leung BP, McInnes IB, et al. IL-35 is a  
639 novel cytokine with therapeutic effects against collagen-induced arthritis through the  
640 expansion of regulatory T cells and suppression of Th17 cells. *Eur J Immunol.*  
641 2007;37(11):3021-9.
- 642 41. Huang C-H, Loo EX-L, Kuo I-C, Soh GH, Goh DL-M, Lee BW, et al. Airway  
643 inflammation and IgE production induced by dust mite allergen-specific  
644 memory/effector Th2 cell line can be effectively attenuated by IL-35. *J Immunol.*  
645 2011;187(1):462-71.
- 646 42. Whitehead GS, Wilson RH, Nakano K, Burch LH, Nakano H, Cook DN. IL-35  
647 production by inducible costimulator (ICOS)-positive regulatory T cells reverses  
648 established IL-17-dependent allergic airways disease. *J Allergy Clin Immunol.*  
649 2012;129(1):207-15.e1-5.
- 650 43. Cao J, Xu F, Lin S, Tao X, Xiang Y, Lai X, et al. IL-35 is elevated in clinical and  
651 experimental sepsis and mediates inflammation. *Clin Immunol.* 2015;161(2):89-95.
- 652 44. Kong B, Liu G-B, Zhang J-A, Fu X-X, Xiang W-Y, Gao YC, et al. Elevated serum IL-  
653 35 and increased expression of IL-35-p35 or-EBI3 in CD4+ CD25+ T cells in  
654 patients with active tuberculosis. *Am J Transl Res.* 2016;8 (2):623-33.
- 655 45. Ahmed AA, van de Sande W, Fahal AH. Mycetoma laboratory diagnosis: Review  
656 article. *PLoS Negl Trop Dis.* 2017; 11(8): e0005638.

- 657 46. Mei JV, Alexander JR, Adam BW, Hannon WH. Use of filter paper for the collection  
658 and analysis of human whole blood specimens. *J Nutr.* 2001;131(5):1631S-6S.
- 659 47. Mercader S, Featherstone D, Bellini WJ. Comparison of available methods to elute  
660 serum from dried blood spot samples for measles serology. *J Virol Methods.*  
661 2006;137(1):140-9.
- 662 48. Parker SP, Cubitt WD. The use of the dried blood spot sample in epidemiological  
663 studies. *J Clin Pathol.* 1999; 52(9): 633–639.
- 664 49. Sibbald B. Helsinki Declaration revisited over concerns about human subjects.  
665 *CMAJ.* 2003; 169(10): 1066.
- 666 50. Rieg S, Meier B, Fähnrich E, Huth A, Wagner D, Kern WV, et al. Differential activity  
667 of innate defense antimicrobial peptides against *Nocardia* species. *BMC Microbiol.*  
668 2010;10:61.
- 669 51. LeibundGut-Landmann S, Wüthrich M, Hohl TM. Immunity to fungi. *Curr Opin*  
670 *Immunol.* 2012; 24(4): 449–458.
- 671 52. Franzenburg S, Fraune S, Künzel S, Baines JF, Domazet-Lošo T, Bosch TC.  
672 MyD88-deficient Hydra reveal an ancient function of TLR signaling in sensing  
673 bacterial colonizers. *Proc Natl Acad Sci U S A.* 2012; 109(47):19374-9.
- 674 53. Taghavi M, Khosravi A, Mortaz E, Nikaein D, Athari SS. Role of pathogen-  
675 associated molecular patterns (PAMPS) in immune responses to fungal infections.  
676 *Eur J Pharmacol.* 2017; 808:8-13.
- 677 54. Conti C, Caraffa A, Kritas S, Ronconi G, Fulcheri M. Alexithymia and its  
678 relationships with inflammatory response mediated by IL-1 family members. *J Biol*  
679 *Regul Homeost Agents.* 2017; 31(1):21-28.

- 680 55. Rivera-Mariani FE, Vysyaraju K, Negherbon J, Levetin E, Horner WE, Hartung T, et  
681 al. Comparison of the interleukin-1 $\beta$ -inducing potency of allergenic spores from  
682 higher fungi (basidiomycetes) in a cryopreserved human whole blood system. *Int*  
683 *Arch Allergy Immunol.* 2014;163(2):154-62.
- 684 56. Cavalli G, Dinarello CA. Suppression of inflammation and acquired immunity by  
685 IL-37. *Immunol Rev.* 2018;281(1):179-190.
- 686 57. Conti P, Tettamanti L, Mastrangelo F, Ronconi G, Frydas I, Kritas SK, et al. Impact  
687 of Fungi on Immune Responses. *Clin Ther.* 2018;40 (6):885-888.
- 688 58. Zhan Q, Zeng Q, Song R, Zhai Y, Xu D, Fullerton DA, et al. IL-37 suppresses  
689 MyD88-mediated inflammatory responses in human aortic valve interstitial cells. *Mol*  
690 *Med.* 2017; 23:83-91.
- 691 59. Huang Z, Gao C, Chi X, Hu YW, Zheng L, Zeng T, et al. IL-37 Expression is  
692 Upregulated in Patients with Tuberculosis and Induces Macrophages Towards an  
693 M2-like Phenotype. *Scand J Immunol.* 2015; 82(4):370-9.
- 694 60. Murray PJ, Wynn TA. Obstacles and opportunities for understanding macrophage  
695 polarization. *J Leukoc Biol.* 2011;89 (4):557-63.
- 696 61. Schreiber T, Ehlers S, Heitmann L, Rausch A, Mages J, Murray PJ, et al. Autocrine  
697 IL-10 induces hallmarks of alternative activation in macrophages and suppresses  
698 antituberculosis effector mechanisms without compromising T cell immunity. *J*  
699 *Immunol.* 2009;183(2):1301-12.
- 700 62. El Kasmi KC, Qualls JE, Pesce JT, Smith AM, Thompson RW, Henao-Tamayo M,  
701 et al. Toll-like receptor–induced arginase 1 in macrophages thwarts effective  
702 immunity against intracellular pathogens. *Nat Immunol.* 2008; 9(12):1399-406.

- 703 63. Du W-X, He Y, Jiang H-Y, Ai Q, Yu JL. Interleukin 35: A novel candidate biomarker  
704 to diagnose early onset sepsis in neonates. *Clin Chim Acta*. 2016;462:90-95.
- 705 64. Li X, Tian L, Dong Y, Zhu Q, Wang Y, Han W, et al. IL-35 inhibits HBV antigen-  
706 specific IFN- $\gamma$ -producing CTLs in vitro. *Clin Sci*. 2015;129 (5):395-404.
- 707 65. Hernández-Hernández F, López-Martínez R, Méndez-Tovar LJ, Manzano-Gayosso  
708 P. *Nocardia brasiliensis*: in vitro and in vivo growth response to steroid sex  
709 hormones. *Mycopathologia*.1995; 132(2): 79-85.
- 710 66. Fahal A, Hassan AME, Abdel-Rahman ME, Alshambaty Y, Hashim A, et al. A new  
711 model for management of mycetoma in the Sudan. *PLoS Negl Trop Dis*. 2014;  
712 8(10):e3271.
- 713 67. Suleiman SH, Wadaella el S, Fahal AH. The Surgical Treatment of Mycetoma. *PLoS*  
714 *Negl Trop Dis*. 2016;10(6):e0004690.
- 715 68. Wadal A, Elhassan TA, Zein HA, Abdel-Rahman ME, Fahal AH. Predictors of Post-  
716 operative Mycetoma Recurrence Using Machine-Learning Algorithms: The  
717 Mycetoma Research Center Experience. *PLoS Negl Trop Dis*.  
718 2016;10(10):e0005007.
- 719 69. Friccius H, Pohla H, Adibzadeh M, Siegels-Hubenthal P, Schenk A, Pawelec G. The  
720 effects of the antifungal azoles itraconazole, fluconazole, ketoconazole and  
721 miconazole on cytokine gene expression in human lymphoid cells. *Int J*  
722 *Immunopharmacol*. 1992;14(5):791-9.
- 723
- 724



726 **Table 1. The Demographic characteristics of the study populations**

727

728

729

730

731

732

733

734

735

736

737

738

739

740

741

742

743

744

745

746

747

748

749

750

|                               |                           | <b>Controls<br/>n=70 (%)</b> | <b>Mycetoma Patients<br/>n=70 (%)</b> |
|-------------------------------|---------------------------|------------------------------|---------------------------------------|
| <b>Gender</b>                 | Female                    | 14 (20)                      | 14 (20%)                              |
|                               | Male                      | 56 (80)                      | 56 (80)                               |
| <b>Age groups<br/>(years)</b> | 12 - 18                   | 9 (12.9)                     | 9 (12.9)                              |
|                               | 19 - 24                   | 22 (31.4)                    | 22 (31.4)                             |
|                               | 25 - 29                   | 16 (22.9)                    | 16 (22.9)                             |
|                               | 30 - 39                   | 14 (20.0)                    | 14 (20.0)                             |
|                               | ≥40                       | 9 (12.9)                     | 9 (12.9)                              |
| <b>Occupation</b>             | Worker                    | 17 (24.3)                    | 23 (32.9)                             |
|                               | Student                   | 23 (32.9)                    | 17 (24.3)                             |
|                               | Farmer                    | 12 (17.1)                    | 12 (17.1)                             |
|                               | Jobless                   | 5 (7.1)                      | 12 (17.1)                             |
|                               | House-wife                | 1 (1.4)                      | 5 (7.1)                               |
|                               | Employer                  | 12 (17.1)                    | 1 (1.4)                               |
| <b>Discharge*</b>             | No                        |                              | 35 (50)                               |
|                               | Yes                       |                              | 35 (50)                               |
| <b>Lesion<br/>diameter*</b>   | Less than 5cm             |                              | 13 (18.6)                             |
|                               | 5-10cm                    |                              | 22 (31.4)                             |
|                               | More than 10cm            |                              | 35 (50.0)                             |
| <b>Duration*</b>              | ≤1 year                   |                              | 22 (31.4)                             |
|                               | 2 – 4 years               |                              | 26 (37.1)                             |
|                               | ≥5 years                  |                              | 22 (31.4)                             |
| <b>Medication*</b>            | Itraconazole<br>200mg/day |                              | 46 (65.7)                             |
|                               | Ketoconazole<br>400mg/day |                              | 24 (34.3)                             |

\*These parameters only for mycetoma patients.

751 **Table 2. Correlations between the serum levels of (IL-1 $\beta$ , IL-37, IL-12 and IL-35) and the lesion**  
 752 **diameter and the control group**

| Lesion diameter                                                            | Cytokine Levels pg/ml | IL-1 $\beta$ pg/ml | IL-37 pg/ml | IL-12 pg/ml | IL-35 pg/ml |
|----------------------------------------------------------------------------|-----------------------|--------------------|-------------|-------------|-------------|
| <b>Controls (no lesion)</b>                                                | IL-1 $\beta$          | 1                  |             |             |             |
|                                                                            | IL-37                 | 0.115              | 1           |             |             |
|                                                                            | IL-12                 | 0.137              | -0.023      | 1           |             |
|                                                                            | IL-35                 | -0.125             | 0.037       | 0.065       | 1           |
| <b>≤5cm</b>                                                                | IL-1 $\beta$          | 1                  |             |             |             |
|                                                                            | IL-37                 | -0.992**           | 1           |             |             |
|                                                                            | IL-12                 | 0.987**            | -0.996**    | 1           |             |
|                                                                            | IL-35                 | -0.924**           | 0.945**     | -0.949**    | 1           |
| <b>5-10cm</b>                                                              | IL-1 $\beta$          | 1                  |             |             |             |
|                                                                            | IL-37                 | -0.991**           | 1           |             |             |
|                                                                            | IL-12                 | 0.991**            | -0.995**    | 1           |             |
|                                                                            | IL-35                 | -0.983**           | 0.989**     | -0.983**    | 1           |
| <b>≥10cm</b>                                                               | IL-1 $\beta$          | 1                  |             |             |             |
|                                                                            | IL-37                 | -0.998**           | 1           |             |             |
|                                                                            | IL-12                 | 0.969**            | -0.971**    | 1           |             |
|                                                                            | IL-35                 | -0.994**           | 0.995**     | -0.964**    | 1           |
| ** Spearman's rho Correlation is significant at the 0.01 level (2-tailed). |                       |                    |             |             |             |

753

754

755

756

757

758

759

760

761

762

763

764

765 **Table 3. Correlations between the serum levels of (IL-1 $\beta$ , IL-37, IL-12 and IL-35) and the duration of**  
 766 **mycetoma infection and the control group**

767

768

769

770

771

772

773

774

775

776

777

778

779

780

781

| Duration                                                                   | Cytokine Levels<br>pg/ml | IL-1 $\beta$ pg/ml | IL-37 pg/ml | IL-12 pg/ml | IL-35 pg/ml |
|----------------------------------------------------------------------------|--------------------------|--------------------|-------------|-------------|-------------|
| <b>Control</b>                                                             | IL-1 $\beta$             | 1                  |             |             |             |
|                                                                            | IL-37                    | 0.115              | 1           |             |             |
|                                                                            | IL-12                    | 0.137              | -0.023      | 1           |             |
|                                                                            | IL-35                    | -0.125             | 0.037       | 0.065       | 1           |
| <b>≤1 Years</b>                                                            | IL-1 $\beta$             | 1                  |             |             |             |
|                                                                            | IL-37                    | -0.997**           | 1           |             |             |
|                                                                            | IL-12                    | 0.997**            | -0.999**    | 1           |             |
|                                                                            | IL-35                    | -0.996**           | 0.997**     | -0.995**    | 1           |
| <b>2 – 4 years</b>                                                         | IL-1 $\beta$             | 1                  |             |             |             |
|                                                                            | IL-37                    | -0.999**           | 1           |             |             |
|                                                                            | IL-12                    | 0.996**            | -0.997**    | 1           |             |
|                                                                            | IL-35                    | -0.997**           | 0.997**     | -0.994**    | 1           |
| <b>≥5 years</b>                                                            | IL-1 $\beta$             | 1                  |             |             |             |
|                                                                            | IL-37                    | -0.999**           | 1           |             |             |
|                                                                            | IL-12                    | 0.986**            | -0.986**    | 1           |             |
|                                                                            | IL-35                    | -0.998**           | 0.997**     | -0.986**    | 1           |
| ** Spearman's rho Correlation is significant at the 0.01 level (2-tailed). |                          |                    |             |             |             |

783 **Table 4. Analysis of the serum cytokine levels of (IL-1 $\beta$ , IL-37, IL-12 and IL-35) within the different**  
 784 **lesion diameter among mycetoma patient and control groups**

785

786

787

788

789

790

791

792

793

794

795

796

797

| Cytokines Levels pg/ml        | Lesion diameter              | Mean $\pm$ SD      | Median | (Q1-Q3)    | P-value*         |
|-------------------------------|------------------------------|--------------------|--------|------------|------------------|
| <b>IL-1<math>\beta</math></b> | <b>Control</b>               | 1.16 $\pm$ 3.15    | 0.11   | 0.3- 0.6   | <b>&lt;0.001</b> |
|                               | <b><math>\leq</math>5cm</b>  | 3.39 $\pm$ 1.07    | 2.45   | 2.5-4.5    |                  |
|                               | <b>5-10cm</b>                | 2.32 $\pm$ 0.05    | 2.3    | 2.3- 2.3   |                  |
|                               | <b><math>\geq</math>10cm</b> | 2.08 $\pm$ 0.11    | 1.97   | 2.1-2.1    |                  |
| <b>IL-37</b>                  | <b>Control</b>               | 22.06 $\pm$ 2.39   | 20     | 22-24      | <b>&lt;0.001</b> |
|                               | <b><math>\leq</math>5cm</b>  | 107.92 $\pm$ 5.96  | 104    | 108-112    |                  |
|                               | <b>5-10cm</b>                | 141.45 $\pm$ 12.96 | 129    | 143-152    |                  |
|                               | <b><math>\geq</math>10cm</b> | 193.20 $\pm$ 15.01 | 184.17 | 189-199    |                  |
| <b>IL-12</b>                  | <b>Control</b>               | 2.46 $\pm$ 1.02    | 1.96   | 2.4-2.5    | <b>&lt;0.001</b> |
|                               | <b><math>\leq</math>5cm</b>  | 25.22 $\pm$ 3.34   | 23.2   | 25-28      |                  |
|                               | <b>5-10cm</b>                | 14.45 $\pm$ 3.32   | 12.4   | 12.9- 18.2 |                  |
|                               | <b><math>\geq</math>10cm</b> | 9.65 $\pm$ 0.36    | 9.49   | 9.5- 9.8   |                  |
| <b>IL-35</b>                  | <b>Control</b>               | 15.97 $\pm$ 2.6    | 14.6   | 16.4-18.2  | <b>&lt;0.001</b> |
|                               | <b><math>\leq</math>5cm</b>  | 255.15 $\pm$ 1.72  | 253    | 255-257    |                  |
|                               | <b>5-10cm</b>                | 263.23 $\pm$ 3.26  | 261    | 262-267    |                  |
|                               | <b><math>\geq</math>10cm</b> | 449.71 $\pm$ 22.2  | 430    | 447-456    |                  |

798 \*P values are derived from non-parametric method; *Kruskal Wallis* test.

799

801 **Table 5. Analysis of the serum cytokine levels of (IL-1 $\beta$ , IL-37, IL-12 and IL-35) among mycetoma**  
 802 **patient stratified by different duration of mycetoma infection compared to controls group**

803

| Cytokines<br>pg/ml            | Duration       | Mean $\pm$ SD     | Median | (Q1- Q3)     | P-value* |
|-------------------------------|----------------|-------------------|--------|--------------|----------|
| <b>IL-1<math>\beta</math></b> | Control        | 1.2 $\pm$ 3.1     | 0.4    | (0.1- 0.6)   | 0.017    |
|                               | $\leq$ 1 year  | 2.3 $\pm$ 0.1     | 2.3    | (2.2- 2.4)   |          |
|                               | 2 - 4 years    | 2.6 $\pm$ 0.9     | 2.2    | (2.1- 2.4)   |          |
|                               | $\geq$ 5 years | 2.3 $\pm$ 0.5     | 2.2    | (2.0- 2.3)   |          |
| <b>IL-37</b>                  | Control        | 22.1 $\pm$ 2.4    | 22.0   | (20- 24)     | <0.001   |
|                               | $\leq$ 1 year  | 146.7 $\pm$ 28.4  | 145.0  | (122- 160)   |          |
|                               | 2 - 4 years    | 160.9 $\pm$ 41.3  | 178.0  | (127- 190)   |          |
|                               | $\geq$ 5 years | 175.7 $\pm$ 33.9  | 185.2  | (156- 194)   |          |
| <b>IL-12</b>                  | Control        | 2.5 $\pm$ 1.0     | 2.4    | (2.0- 2.5)   | <0.001   |
|                               | $\leq$ 1 year  | 14.9 $\pm$ 5.0    | 12.5   | (10.5- 19.5) |          |
|                               | 2 - 4 years    | 15.0 $\pm$ 7.5    | 10.2   | (9.5- 19.4)  |          |
|                               | $\geq$ 5 years | 12.1 $\pm$ 5.4    | 9.8    | (9.5- 12.1)  |          |
| <b>IL-35</b>                  | Control        | 16.0 $\pm$ 2.6    | 16.4   | (14.6- 18.2) | <0.001   |
|                               | $\leq$ 1 year  | 301.9 $\pm$ 75.9  | 262.5  | (260- 271)   |          |
|                               | 2 - 4 years    | 363.8 $\pm$ 101.5 | 423.5  | (260- 447)   |          |
|                               | $\geq$ 5 years | 397.6 $\pm$ 88.1  | 436.0  | (267- 450)   |          |

804 \*P values are derived from non-parametric method; *Kruskal Wallis* test.

805

806

808 **Table 6. Risk factors for circulating cytokines IL-37 pg/ml in mycetoma patients with different lesion**  
 809 **diameters**

810

| variable                      | Category                      | B <sup>‡</sup> | 95% Confidence Interval |  | p-value      |
|-------------------------------|-------------------------------|----------------|-------------------------|--|--------------|
|                               |                               |                | (Lower to Upper)        |  |              |
| <b>Intercept</b>              |                               | 228.4          | (208.6 to 248.1)        |  | <0.001       |
| <b>IL-1<math>\beta</math></b> |                               | -9.1           | (-15.7 to -2.5)         |  | 0.008        |
| <b>Lesion diameter</b>        | <b>≤5cm</b>                   | -75.4          | (-88.4 to -62.3)        |  | <0.001       |
|                               | <b>5-10cm</b>                 | -52.6          | (-64.3 to -40.8)        |  | <0.002       |
|                               | <b>≥10cm</b>                  | 0              |                         |  |              |
| <b>Gender</b>                 | <b>Female</b>                 | -5.3           | (-13.1 to 2.5)          |  | 0.176        |
|                               | <b>Male</b>                   | 0              |                         |  |              |
| <b>Age groups years</b>       | <b>12 - 18</b>                | -11.7          | (-23.2 to -0.2)         |  | 0.047        |
|                               | <b>19 - 24</b>                | -13.3          | (-23.2 to -3.3)         |  | <b>0.010</b> |
|                               | <b>25 - 29</b>                | -9.5           | (-20.0 to 1.1)          |  | 0.079        |
|                               | <b>30 - 39</b>                | -11.8          | (-22.3 to -1.2)         |  | <b>0.029</b> |
|                               | <b>≥40</b>                    | 0              |                         |  |              |
| <b>Medication</b>             | <b>Itraconazole 200mg/day</b> | -5.7           | (-16.4 to 5)            |  | 0.293        |
|                               | <b>Ketoconazole 400mg/day</b> | 0              |                         |  |              |

811 <sup>‡</sup>B (95%CI) adjusted with lesion diameter, gender, age groups and medical treatments.

812

813

814

815

816

817

818

819

820

821

822

823 **Table 7. Risk factors for circulating cytokines IL-35 pg/ml in mycetoma patients with different lesion**  
 824 **diameters**

|                         | Parameter                     | B <sup>‡</sup> | 95% Confidence Interval<br>(Lower to Upper ) | P-value          |
|-------------------------|-------------------------------|----------------|----------------------------------------------|------------------|
| <b>Intercept</b>        |                               | 460.0          | (437.5 to 482.4)                             | <b>&lt;0.001</b> |
| <b>IL-12</b>            |                               | -1.2           | (-2.9 to 0.6)                                | 0.182            |
| <b>Lesion diameter</b>  | <b>≤5cm</b>                   | -174.4         | (-205.2 to -143.5)                           | <b>&lt;0.001</b> |
|                         | <b>5-10cm</b>                 | -176.5         | (-194.8 to -158.1)                           | <b>&lt;0.001</b> |
|                         | <b>≥10cm</b>                  | 0.0            |                                              |                  |
| <b>Gender</b>           | <b>Female</b>                 | -2.9           | (-13.4 to 7.5)                               | 0.575            |
|                         | <b>Male</b>                   | 0.0            |                                              |                  |
| <b>Age groups years</b> | <b>12 - 18</b>                | 5.6            | (-9.6 to 20.7)                               | 0.464            |
|                         | <b>19 - 24</b>                | -1.8           | (-14.7 to 11.2)                              | 0.786            |
|                         | <b>25 - 29</b>                | -2.5           | (-16.3 to 11.4)                              | 0.722            |
|                         | <b>30 - 39</b>                | -7.9           | (-21.8 to 6.0)                               | 0.258            |
|                         | <b>≥40</b>                    | 0.0            |                                              |                  |
| <b>Medication</b>       | <b>Itraconazole 200mg/day</b> | 2.9            | (-11.4 to 17.3)                              | 0.683            |
|                         | <b>Ketoconazole 400mg/day</b> | 0.0            |                                              |                  |

825

826 <sup>‡</sup>B (95%CI) adjusted with lesion diameter, gender, age groups and medical treatments.

827

828

830 **Table 8. Risk factors for circulating cytokines IL-37 pg/ml among mycetoma patients with different**  
 831 **duration of mycetoma infection**

|                                       | Parameter                     | B <sup>‡</sup> | 95% Confidence Interval |  | P-value          |
|---------------------------------------|-------------------------------|----------------|-------------------------|--|------------------|
|                                       |                               |                | Lower to Upper          |  |                  |
|                                       | <b>Intercept</b>              | 254.499        | 225.3 to 283.7          |  | <b>&lt;0.001</b> |
|                                       | <b>IL-1<math>\beta</math></b> | -35.28         | -43.9 to -26.7          |  | <b>&lt;0.001</b> |
| <b>Duration of mycetoma infection</b> | <b>≤1 year</b>                | -18.45         | -32.3 to -4.6           |  | 0.010            |
|                                       | <b>2 - 4 years</b>            | -1.774         | -15.2 to 11.7           |  | 0.793            |
|                                       | <b>≥5 years</b>               | 0              |                         |  |                  |
| <b>Gender</b>                         | <b>Female</b>                 | -3.223         | -16.4 to 10.0           |  | 0.627            |
|                                       | <b>Male</b>                   | 0              |                         |  |                  |
| <b>Age groups years</b>               | <b>12 - 18</b>                | -14.631        | -35.6 to 6.4            |  | 0.169            |
|                                       | <b>19 - 24</b>                | -20.445        | -37.8 to -3.1           |  | <b>0.022</b>     |
|                                       | <b>25 - 29</b>                | -20.199        | -38.5 to -2.0           |  | <b>0.030</b>     |
|                                       | <b>30 - 39</b>                | -22.68         | -42.0 to -3.4           |  | <b>0.022</b>     |
|                                       | <b>≥40</b>                    | 0              |                         |  |                  |
| <b>Medication</b>                     | <b>Itraconazole 200mg/day</b> | 23.977         | 11.8 to 36.1            |  | <b>&lt;0.001</b> |
|                                       | <b>Ketoconazole 400mg/day</b> | 0              |                         |  |                  |

832

833 <sup>‡</sup>B (95%CI) adjusted with Duration of mycetoma infection, gender, age groups and medical treatments.

834

835



837 **Table 9. Risk factors for circulating cytokines IL-35 pg/ml among mycetoma patients with different**  
 838 **duration of mycetoma infection**

|                                       | Parameter                     | B <sup>‡</sup> | 95% Confidence Interval |  | P-value          |
|---------------------------------------|-------------------------------|----------------|-------------------------|--|------------------|
|                                       |                               |                | (Lower to Upper )       |  |                  |
| <b>Intercept</b>                      |                               | 436.50         | 394.36 to 478.64        |  | <b>&lt;0.001</b> |
| <b>IL-12</b>                          |                               | -8.99          | -10.73 to -7.25         |  | <b>&lt;0.001</b> |
| <b>Duration of mycetoma infection</b> | ≤1 year                       | -41.82         | -67.31 to -16.32        |  | <b>0.002</b>     |
|                                       | 2 - 4 years                   | -10.64         | -35.28 to 14.01         |  | 0.391            |
|                                       | ≥5 years                      | 0              |                         |  |                  |
| <b>Gender</b>                         | <b>Female</b>                 | -8.47          | -32.85 to 15.90         |  | 0.49             |
|                                       | <b>Male</b>                   | 0              |                         |  |                  |
| <b>Age groups years</b>               | <b>12 - 18</b>                | 9.23           | -29.02 to 47.48         |  | 0.631            |
|                                       | <b>19 - 24</b>                | 8.00           | -24.05 to 40.06         |  | 0.619            |
|                                       | <b>25 - 29</b>                | -2.19          | -36.43 to 32.05         |  | 0.899            |
|                                       | <b>30 - 39</b>                | -30.58         | -66.01 to 4.84          |  | 0.089            |
|                                       | <b>≥40</b>                    | 0              |                         |  |                  |
| <b>Medication</b>                     | <b>Itraconazole 200mg/day</b> | 101.17         | 78.40 to 123.95         |  | <b>&lt;0.001</b> |
|                                       | <b>Ketoconazole 400mg/day</b> | 0              |                         |  |                  |

839 ‡B (95%CI) adjusted with Duration of mycetoma infection, gender, age groups and medical treatments.

840

841

842
